# Supplementary material for: The Effect of Change of Working Schedule on Health Behaviors: Evidence from the Korea Labor and Income Panel Study (2005–2019)
Source: MDPI journal article supplement (doi:10.3390/jcm11061725), 2022-03-20
Supplement: s1 [file s1]

**Supplementary Table S1.** Results of a generalized estimating equation analyzing the changes in smoking and drinking status during the 14 year follow-up period according to covariates.

| Covariates                    | Healthy to Unhealthy Behavior | Never or Past to Current Smoking | Never or Social to Binge Drinking |
|-------------------------------|-------------------------------|----------------------------------|-----------------------------------|
|                               | OR (95% CI)                   | OR (95% CI)                      | OR (95% CI)                       |
| Age (years)                   |                               |                                  |                                   |
| 15~20                         | 1.00                          | 1.00                             | 1.00                              |
| 21~40                         | 1.04 (0.22-4.82)              | 0.23 (0.02-2.15)                 | 0.90 (0.19-4.19)                  |
| 41~60                         | 0.64 (0.14-2.96)              | 0.14 (0.02-1.37)                 | 0.57 (0.12-2.65)                  |
| > 60                          | 0.41 (0.09-1.93)              | 0.12 (0.01-1.12)                 | 0.35 (0.08-1.64)                  |
| Sex                           |                               |                                  |                                   |
| Male                          | 1.00                          | 1.00                             | 1.00                              |
| Female                        | <b>0.65 (0.60-0.70)</b>       | <b>0.07 (0.06-0.09)</b>          | 0.95 (0.87-1.03)                  |
| Education level               |                               |                                  |                                   |
| Middle school                 | 1.00                          | 1.00                             | 1.00                              |
| High School                   | <b>0.81 (0.74-0.90)</b>       | <b>0.79 (0.67-0.95)</b>          | <b>0.82 (0.73-0.92)</b>           |
| College or higher             | <b>0.72 (0.64-0.81)</b>       | <b>0.67 (0.55-0.81)</b>          | <b>0.76 (0.67-0.87)</b>           |
| Occupational classification   |                               |                                  |                                   |
| White-collar                  | 1.00                          | 1.00                             | 1.00                              |
| Pink-collar                   | 0.99 (0.89-1.12)              | 1.09 (0.90-1.34)                 | 0.97 (0.86-1.10)                  |
| Green-collar                  | 0.94 (0.46-1.95)              | 1.14 (0.40-3.23)                 | 0.68 (0.27-1.73)                  |
| Blue-collar                   | 0.93 (0.86-1.02)              | <b>0.86 (0.75-0.99)</b>          | 0.95 (0.87-1.05)                  |
| Monthly wage income (\$, USD) |                               |                                  |                                   |
| <1500                         | 1.00                          | 1.00                             | 1.00                              |
| 1500–2000                     | 0.97 (0.88-1.07)              | 0.97 (0.80-1.19)                 | 0.96 (0.87-1.07)                  |
| 2000–2500                     | 1.01 (0.91-1.13)              | 1.07 (0.87-1.30)                 | 0.99 (0.88-1.12)                  |
| >2500                         | 1.03 (0.93-1.15)              | <b>1.25 (1.04-1.52)</b>          | 0.93 (0.83-1.05)                  |
| Self-rated health status      |                               |                                  |                                   |
| Good                          | 1.00                          | 1.00                             | 1.00                              |
| Moderate                      | 0.99 (0.92-1.06)              | 0.96 (0.86-1.08)                 | 0.99 (0.91-1.06)                  |
| Bad                           | 1.03 (0.89-1.19)              | 1.22 (0.96-1.56)                 | 1.02 (0.86-1.20)                  |

Bold indicates statistical significance. Risk is represented as odds ratio (95% confidence interval). All results were adjusted for age in observation year, sex, education level, occupational classification, monthly wage income level, self-rated health status, and change of working schedule. 'Healthy to unhealthy behavior' indicates changes from 'Never or past to current smoking' or 'Never or social to binge drinking'.
